# Supplementary material for: Ethical conflict and moral distress in veterinary practice: A survey of North American veterinarians
Source: PubMed Central journal article supplement — J Vet Intern Med. 2018 Oct 15;32(6):2115–22. doi: 10.1111/jvim.15315 (PMC6271308; doi:10.1111/jvim.15315), 2018-10-15
Supplement: JVIM-32-2115-s001.pdf [file JVIM-32-2115-s001.pdf]

## Supplementary Material:

### Survey Questions:

#### I. Demographic Information

1. How long have you been in veterinary practice?
2. What year did you graduate from veterinary school?
3. Do you have a specialty within vet medicine? If so, what is it?
4. Are you currently practicing clinical veterinary medicine or have you been in the past 3 years?
5. What US state or Canadian province do you practice in?
6. Are you a solo practitioner?
7. Approximately how many employees do you work with?
  - a. How many veterinarians?
  - b. How many non-veterinarians?

#### II. Professional Experiences

8. How often do you have a conflict of opinion with pet owners about how they wish to proceed in the treatment of their pets? Never? Rarely? Sometimes? Often? Always?
  - a. If so, what do you do, if anything, when you have a difference of opinion about how to proceed in the care of a pet? Done nothing? Talked with spouse? Discussed with colleague? Sought professional help? Other (please describe)?
9. Have you ever been asked to do something in the course of your clinical practice that feels like the wrong thing to do? Never? Rarely? Sometimes? Often? Always?
  - a. If so, how often have you complied with these requests? Never? Rarely? Sometimes? Often? Always?
  - b. Did you feel like you had the right to say no?
10. Have you ever had a case where you felt like you couldn't do the "right thing"? Never? Rarely? Sometimes? Often? Always?
  - a. What prevented you from doing the right thing?
  - b. Did this cause you: No distress? Mild distress? Moderate distress? Severe distress?
  - c. Did this cause distress in any of your staff? No distress? Mild distress? Moderate distress? Severe distress?
  - d. What, if anything, did you do about it? Done nothing? Talked with spouse? Discussed with colleague? Sought professional help? Other (please describe)?
11. Do you ever get what you consider to be inappropriate requests for euthanasia? Never? Rarely? Sometimes? Often? Always?
  - a. Have you ever complied with these requests? Never? Rarely? Sometimes? Often? Always?
  - b. If so, does this cause you or your staff noticeable distress? Mild distress? Moderate distress? Severe distress?

12. Have you ever managed cases where you feel that a pet owner is requesting treatment when you consider those efforts to be futile? Never? Rarely? Sometimes? Often? Always?
  - a. What strategies did you use to manage this situation? Done nothing? Discussed with colleague? Other (please describe)?
13. Have you ever refused to provide a treatment that you feel is futile?
14. How often do you feel conflicted or upset because a pet owner refuses to do what you think is in the best interest of your patient? Never? Rarely? Sometimes? Often? Always?
  - a. If you have experienced these feelings, how have you opted to cope with them? Done nothing? Talked with spouse? Discussed with colleague? Sought professional help? Other (please describe)?
15. Do you ever feel like you prioritize the needs of animal owners over your patients?
  - a. Do you feel conflicted about this?
  - b. If so, why?
16. How often do you recommend euthanasia to pet owners? Never? Rarely? Sometimes? Often?
17. Do you recommend euthanasia to pet owners when they have already said they will not consider it?
  - a. If so, what strategies do you employ to support your position?
18. Have you experienced owners putting obstacles in the way of animals receiving care that you recommend? Never? Rarely? Sometimes? Often? Always?
  - a. If so, what sorts of obstacles have you experienced and how much distress has it caused you, at its worst? Mild distress? Moderate distress? Severe distress?
19. How often have you felt distressed or anxious about your work? Never? Rarely? Sometimes? Often? Always?
20. Have you been asked to do things that are outside of your skill set for financial or other reasons? Never? Rarely? Sometimes? Often? Always?
  - a. If so, does this cause conflict? Never? Rarely? Sometimes? Often? Always?
21. Have you had disagreements with other veterinarians about how best to manage a case you share? Never? Rarely? Sometimes? Often? Always?
  - a. If so, do these disagreements cause distress for you?
  - b. If so, how much distress have they caused you, at worst? Mild distress? Moderate distress? Severe distress?
  - c. If so, are disagreements with other veterinarians more or less distressing than when you disagree with a pet owner?
  - d. If so, how have you resolved such situations? Done nothing? Discussed with colleague? Other (please describe)?
22. Have you had disagreements with other members of your staff (i.e. non-veterinarians) about how best to proceed with a clinical case? Never? Rarely? Sometimes? Often? Always?

23. In your veterinary training, how many hours of instruction or training did you receive about resolving differences of opinion about what is best care for patients?
- None
  - 1-5 hours
  - More than 5 hours
24. In your veterinary training, how many hours of instruction or training in self-care did you receive?
- None
  - 1-5 hours
  - More than 5
25. Do you feel that your compassion or ability to empathize towards your patients has waned over the course of your practice?
26. Do you feel like you have lost compassion for pet owners over the course of your practice?
27. How often do you feel like you are just going through the motions? Never? Rarely? Sometimes? Often? Always?
